# Supplementary material for: Rapid vessel segmentation and reconstruction of head and neck angiograms using 3D convolutional neural network
Source: PubMed Central journal article supplement (PMC7518426; doi:10.1038/s41467-020-18606-2), 2020-09-24
Supplement: 41467_2020_18606_MOESM2_ESM.pdf [file 41467_2020_18606_MOESM2_ESM.pdf]

Fu et al.

**Rapid vessel segmentation and reconstruction of head and neck angiograms using**

**3D convolutional neural network**

Supplementary Table 1. Comparison of image quality between CerebralDoc and

Manual processing

|         | CerebralDoc                                       | Manual processing                                 | <i>P</i> value |
|---------|---------------------------------------------------|---------------------------------------------------|----------------|
|         | (Percentiles, P <sub>25</sub> , P <sub>75</sub> ) | (Percentiles, P <sub>25</sub> , P <sub>75</sub> ) |                |
| VR      | (3,3)                                             | (2,3)                                             | <0.001         |
| MIP     | (3,3)                                             | (2,2)                                             | <0.001         |
| MPR/CPR | (3,3)                                             | (3,3)                                             | 0.617          |

Mann–Whitney test were used for comparing two groups.

Supplementary Table 2. Comparison with previous work, two categories of methods (rule-based and DL-based) are listed.

| Type       | Study                            | Test set patients | Image | AO    | Carotid artery | Cerebral vessel |
|------------|----------------------------------|-------------------|-------|-------|----------------|-----------------|
|            |                                  |                   |       | DSC   | DSC            | DSC             |
| Rule-based | Olivier Cuisenaire et al. (2009) | 28                | CTA   | -     | 90.3           | -               |
|            | Danilo Babin et al. (2013)       | 4                 | CTA   | -     | -              | 0.82            |
|            | Duan et al. (2016)               | 10                | CTA   | 0.93  | -              | -               |
| DL         | Michelle Livne et al. (2019)     | 66                | MRA   | -     | -              | 0.88            |
|            | Ours                             | 1826              | CTA   | 0.975 |                |                 |
